# Supplementary material
Source: PubMed Central journal article supplement (PMC3411890)
Supplement: NIHMS389753-supplement-01.pdf [file NIHMS389753-supplement-01.pdf]

**Online Table 1: HR (95% CI) for incident CHD and CVD for a 1 SD difference  
in HDL-C and HDLP**

|               | Hard CHD                                  | All CVD           | Hard CVD          |
|---------------|-------------------------------------------|-------------------|-------------------|
| N cases/total | 139/5598                                  | 320/5598          | 224/5598          |
| Model         | HR ((95% CI) for 1 SD difference in HDL-C |                   |                   |
| 1             | 0.75 (0.61, 0.93)                         | 0.75 (0.65, 0.86) | 0.76 (0.64, 0.89) |
| 2             | 0.78 (0.62, 0.97)                         | 0.80 (0.70, 0.93) | 0.80 (0.68, 0.95) |
| 3             | 1.03 (0.78, 1.36)                         | 0.97 (0.80, 1.16) | 1.01 (0.81, 1.25) |
| Model         | HR (95% CI) for 1 SD difference in HDL-P  |                   |                   |
| 1             | 0.66 (0.53, 0.81)                         | 0.71 (0.62, 0.81) | 0.69 (0.59, 0.81) |
| 2             | 0.67 (0.54, 0.83)                         | 0.75 (0.66, 0.86) | 0.72 (0.61, 0.85) |
| 3             | 0.66 (0.50, 0.87)                         | 0.77 (0.64, 0.92) | 0.72 (0.58, 0.89) |

Model 1: Adjusted for base covariates of age, sex, ethnicity, hypertension, smoking; Model 2: Adjusted for base covariates plus LDL-P; Model 3: Adjusted for base covariates plus LDL-P and HDL-P (for HDL-C) and HDL-C (for HDL-P).

Abbreviations: HDL: High density lipoprotein, LDL-C: HDL cholesterol, HDL-P: HDL particles, LDL: Low density lipoprotein, LDL-C: LDL cholesterol, LDL-P: LDL particles, TG: Triglycerides
